# Supplementary material for: The diadromous watersheds-ocean continuum: Managing diadromous fish as a community for ecosystem resilience
Source: Frontiers journal article supplement (doi:10.3389/fevo.2022.1007599), 2022-11-08
Supplement: Table_1.DOCX [file Table_1.DOCX]

Supplementary Material

# Supplementary Data - Web of Science search

The search to capture papers between 2010 and 2020 using:

alewife OR alosa OR conger eel OR conger OR american shad OR American eel OR anguilla rostrata OR atlantic salmon OR salmo salar OR Atlantic sturgeon OR acipenser OR atlantic tomcod OR microgadus OR blueback herring OR brook tout and searun OR fontinalis OR hickory shad OR rainbow smelt OR osmerus mordax OR sea lamprey OR petromyzon marunis OR sortnose sturgeon OR striped bass OR morone saxatilis AND diadromous OR anadromous or catadromous

- The returns for which these species were only mentioned once were subsequently deleted from the results.
- The papers with aquaculture in the title and keywords were also deleted from the results, maximizing the number of publications on wild populations only. However, although the bulk of the results from this search is on wild populations, there is still a small fraction of aquaculture papers in the results.
